# Supplementary material for: Construction of the Ukrainian Carpathian wedge from low-temperature thermochronology and tectono-stratigraphic analysis
Source: Copernicus journal article supplement (doi:10.5194/se-14-153-2023), 2023-02-23
Supplement: Supplementary file 1 [file se-14-153-2023-supplement.pdf]

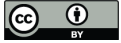

*Supplement of*

## **Construction of the Ukrainian Carpathian wedge from low-temperature thermochronology and tectono-stratigraphic analysis**

**Marion Roger et al.**

*Correspondence to:* Marion Roger ([marion.roger@univ-grenoble-alpes.fr](mailto:marion.roger@univ-grenoble-alpes.fr))

The copyright of individual parts of the supplement might differ from the article licence.

## Sect. S1

From supplementary figure S1, we discriminate the reset and partially reset samples from the non-reset samples (S1, a). CAR19-061 is the only non-reset samples we have in our set, but CAR19-045 and CAR19-066 are very close to the limit and the  $2\sigma$  error fall in the left part of the limit line. Repartition of the AFT age as a function of the elevation of the sampling site mark a pattern of increased altitude for older ages, apart from the samples from Magura nappe (i.e., CAR19-061 and CAR19-066). The difference in elevation is low ( $\approx 500\text{m}$ ) for our data set. Usually more elevated samples tend to have younger ages due to the thermal regime in mountains belt where elevated area possess higher heat production (concentration of crust material in the high elevated areas) and faster heat advection (by active topography building and thrusting/fault activity). Strikingly the oldest and highest samples are beared in the more external nappes (Krosno and Skyba nappes) and as elevation decrease, the youngest samples are toward the internal nappes (Burkut and Dukla nappes). The Magura nappe, which is the back stop of our wedge, is showing the oldest ages and the lowest elevation in the dataset, implying less burial coupled with a longer period of exposition to erosion for this nappe. For the rest of the units, the increase of age toward the outer belt and the higher elevation is coherent with the dynamic of the retreating subduction zone and a thermally “immature” wedge building in the Ukrainian Carpathians (Dahlen et al., 1984; Royden, 1993a, b; Willett and Brandon, 2002; Husson and Moretti, 2002). The mean track length (MTL) compared to the age of the AFT samples don’t display any pattern of shorter tracks in younger samples. High dispersion ( $> 30\%$ ) is present for all our samples (except for CAR19-068 with 25% and CAR19-062 with 29%) and samples often show two to three grain populations. This high difference inside each sample can lead to no correlation in track length measurement and AFT age, especially when track length measurement is low (in our case no more than 21 track measured in a sample).

## 20 Sect. S2 and S3

AHe single-grain age from our study show non-reset ages (CAR19-066\_a2 and for CAR19-072\_a2) and some partial reset ages (see A1 a), c) and e)). Most of the AHe ages are around 10 Ma when reset. The AHe with ages close to the CA of the corresponding AFT can be the result of the differential annealing between the grain population (this is the case for sample CAR19-061, -066 and -072). Comparing the ESR (equivalent spherical radius) and the eU (equivalent Uranium content) to the AHe single-grain age show no correlation of these parameters. Old AHe ages are in the mean range for the eU content (10-60 ppm) and the ESR (60-80  $\mu\text{m}$ ) and AHe ages around 10 Ma pertain the maximum and minimum in both characteristics. Sample CAR19-068 has the smallest differences among grains for eU and ESR, in accordance with a single population in AFT ages (25 % of dispersion).

ZHe ages compared to the stratigraphic age (A1 b)) show the clear non-reset of the thermochronometer in our data. We also identified a population of ages around 100 Ma, and one older ranging from 200 – 400 Ma. As for AHe single grain, there are

no evident correlations between the ZHe ages and ESR or eU content. It is worth noticing that for zircons, CAR19-068 show a larger dispersion of grains characteristics, unlike CAR19-061 and CAR19-062 that display great similarities between grains (except for CAR19-061\_z4) which do not show for the apatite grains.

## References

- 35 Dahlen, F. A., Suppe, J., and Davis, D.: Mechanics of fold-and-thrust belts and accretionary wedges: Cohesive Coulomb Theory, *J. Geophys. Res.*, 89, 10087–10101, <https://doi.org/10.1029/JB089iB12p10087>, 1984.
- Husson, L. and Moretti, I.: Thermal regime of fold and thrust belts—an application to the Bolivian sub Andean zone, *Tectonophysics*, 345, 253–280, [https://doi.org/10.1016/S0040-1951\(01\)00216-5](https://doi.org/10.1016/S0040-1951(01)00216-5), 2002.
- Royden, L. H.: The steady state thermal structure of eroding orogenic belts and accretionary prisms, *J. Geophys. Res.*, 98, 4487–4507, <https://doi.org/10.1029/92JB01954>, 1993a.
- Royden, L. H.: The tectonic expression slab pull at continental convergent boundaries, *Tectonics*, 12, 303–325, <https://doi.org/10.1029/92TC02248>, 1993b.
- Willett, S. D. and Brandon, M. T.: On steady states in mountain belts, *Geol*, 30, 175, [https://doi.org/10.1130/0091-7613\(2002\)030<0175:OSSIMB>2.0.CO;2](https://doi.org/10.1130/0091-7613(2002)030<0175:OSSIMB>2.0.CO;2), 2002.

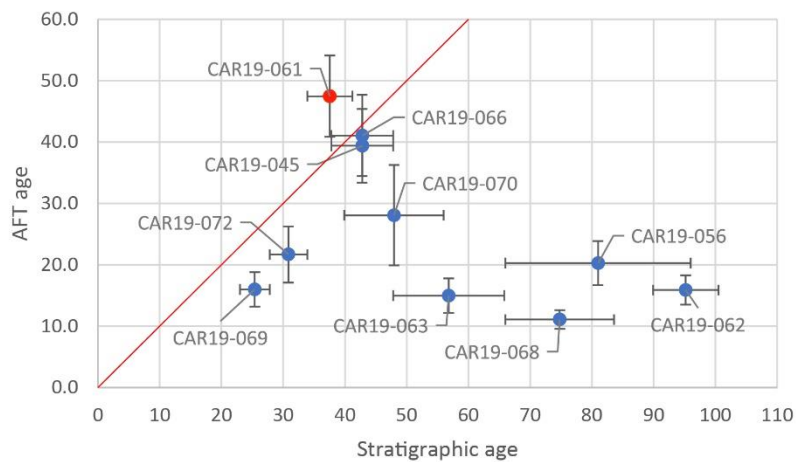

a

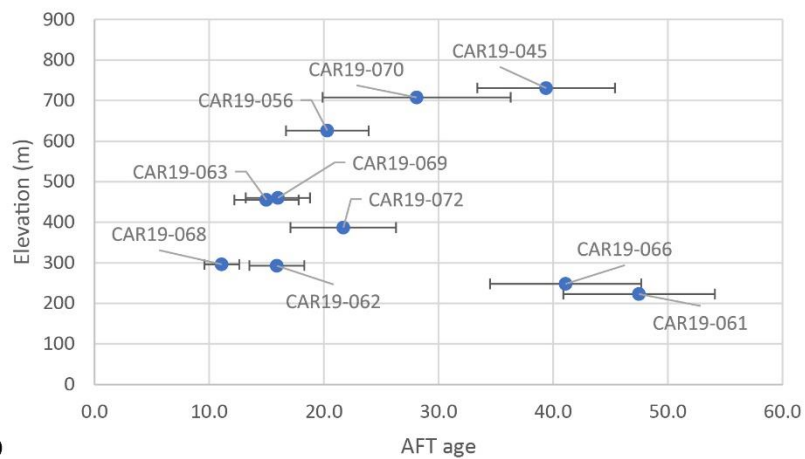

b

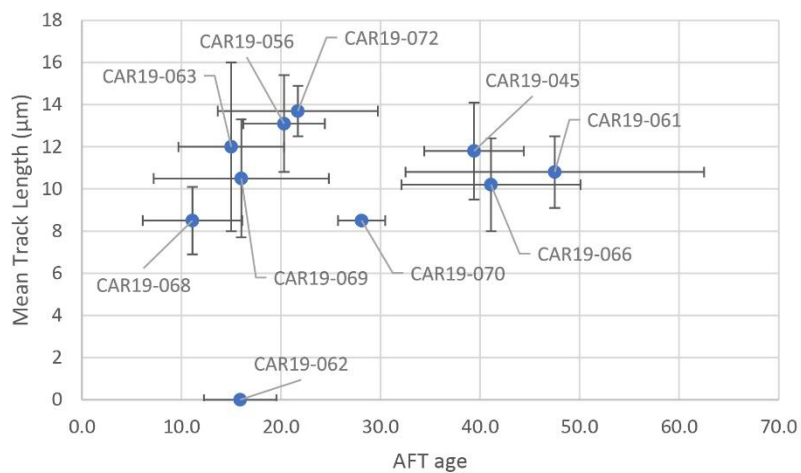

c

50 S 1: a) Graphic of AFT age vs. Stratigraphic age, both scales are in My. The red line shows the delimitation for: on the left non-  
 55 reset samples (here only CAR19-061); on the right reset and partially reset samples. CAR19-045 and CAR19-066 samples display  
 very poor partial resetting compared to the reset of the “reset” samples. b) AFT age vs. Elevation of the sampling site. Elevation  
 and topography are supposed to have remained low in the Ukrainian Carpathians region. The older AFT ages are at a higher  
 elevation in our case, as we speak in terms of nappes, the external nappes Krosno and Skyba (CAR19-045, -056, -069, -070, -072)  
 have higher elevation and older AFT central age. Burkut and Dukla samples (CAR19-062, -063, -068) are more internal and less  
 elevated but also younger for AFT thermochronometer. The samples out of the trend of younger AFT ages toward low elevation  
 are the samples from Magura nappe (CAR19-061, -066), both showing non-reset or very poor partial resetting. c) AFT age vs.  
 Mean track length (CAR19-062 has no track length counted). Mean track length should align with the degree of resetting of each  
 sample i.e., annealing of tracks is due to higher burial temperature or long residence at the PAZ, and should correspond to higher  
 degree of resetting of the AFT. This pattern isn't obvious in our dataset. Non-reset, or very poorly reset sample (CAR19-061, -066,  
 -045) have MTL of 10-12  $\mu\text{m}$ , comparable to the MTL of CAR19-063 and CAR19-069, which display more resetting.

60

| Sample      | mineral | Ft      |          | 2s       |          | 147Sm    |          |          | He      |          |          | Ft     | ESR (mm) |
|-------------|---------|---------|----------|----------|----------|----------|----------|----------|---------|----------|----------|--------|----------|
|             |         | Age, Ma | err., Ma | analytic | err., Ma | U (ppm)  | Th (ppm) | (ppm)    | [U]e    | Th/ 238U | (nmol/g) |        |          |
| Dur930_a1   | Apatite | 40.6410 | 1.5143   | 1.0937   | 1.6224   | 27.5233  | 3.6929   | 8.0903   | 17.5284 | 1.7959   | 37.5024  | 1.0000 | 121.8247 |
| Dur930_a2   | Apatite | 30.6691 | 1.1054   | 0.8652   | 3.5240   | 70.2528  | 8.9501   | 20.0334  | 20.5975 | 3.3550   | 25.3718  | 1.0000 | 107.0631 |
| Dur930_a3   | Apatite | 29.6255 | 0.3847   | 0.2803   | 3.6537   | 64.1073  | 7.3323   | 18.7189  | 18.1287 | 3.0262   | 33.7372  | 1.0000 | 115.2892 |
| CAR19-63_a1 | Apatite | 9.3098  | 0.4653   | 0.2995   | 5.9116   | 18.7023  | 3.8020   | 10.3066  | 3.2687  | 0.4069   | 6.5145   | 0.7808 | 68.4279  |
| CAR19-62_a1 | Apatite | 41.0700 | 1.0824   | 0.6261   | 11.9649  | 44.8312  | 22.0715  | 22.5002  | 3.8713  | 4.0394   | 8.3652   | 0.7990 | 74.6325  |
| CAR19-62_a2 | Apatite | 10.7433 | 0.5395   | 0.3764   | 10.9541  | 88.9777  | 4.0780   | 31.8638  | 8.3926  | 1.4163   | 5.1058   | 0.7615 | 62.8878  |
| CAR19-62_a3 | Apatite | 3.4658  | 0.2089   | 0.1355   | 1.7702   | 45.4976  | 5.3992   | 12.4622  | 26.5551 | 0.1859   | 7.1869   | 0.7890 | 71.0808  |
| CAR19-56_a1 | Apatite | 9.7806  | 0.3043   | 0.1691   | 24.6810  | 78.8466  | 48.6459  | 43.2099  | 3.3007  | 1.7365   | 4.6311   | 0.7519 | 60.4649  |
| CAR19-56_a2 | Apatite | 9.1818  | 0.3653   | 0.2125   | 44.7140  | 180.2646 | 22.6570  | 87.0762  | 4.1654  | 3.3541   | 5.9541   | 0.7727 | 65.9914  |
| CAR19-56_a3 | Apatite | 8.9343  | 0.2880   | 0.1100   | 136.8446 | 194.3596 | 60.2509  | 182.5191 | 1.4675  | 6.6015   | 4.3863   | 0.7471 | 59.3007  |
| CAR19-69_a1 | Apatite | 12.1729 | 0.3960   | 0.1241   | 34.8693  | 116.1868 | 7.4685   | 62.1732  | 3.4427  | 3.2048   | 6.4073   | 0.7811 | 68.5161  |
| CAR19-69_a2 | Apatite | 9.6729  | 0.2208   | 0.1316   | 19.7150  | 79.9881  | 8.7512   | 38.5122  | 4.1919  | 1.6454   | 10.4309  | 0.8137 | 80.5269  |
| CAR19-69_a3 | Apatite | 13.8216 | 0.2591   | 0.1614   | 37.6026  | 82.7747  | 44.5435  | 57.0546  | 2.2744  | 3.4600   | 9.4982   | 0.8056 | 77.1795  |
| CAR19-45_a1 | Apatite | 8.1836  | 0.2041   | 0.1793   | 7.6135   | 18.5761  | 16.5109  | 11.9789  | 2.5209  | 0.4199   | 6.7071   | 0.7829 | 69.0783  |
| CAR19-45_a2 | Apatite | 17.0282 | 0.9147   | 0.5099   | 4.4731   | 36.0914  | 13.1468  | 12.9546  | 8.3365  | 0.9134   | 4.9951   | 0.7564 | 61.5710  |
| CAR19-45_a3 | Apatite | 9.1607  | 0.3834   | 0.2432   | 10.4214  | 68.1773  | 24.7579  | 26.4430  | 6.7593  | 1.0989   | 15.3844  | 0.8300 | 88.2276  |
| CAR19-47_a1 | Apatite | 0.1376  | 0.1018   | 0.1006   | 9.3638   | 2.1437   | 60.8062  | 9.8675   | 0.2365  | 0.0062   | 9.0567   | 0.8049 | 76.8677  |
| CAR19-47_a2 | Apatite | 9.5252  | 0.1954   | 0.1369   | 25.3028  | 31.6357  | 17.6197  | 32.7372  | 1.2918  | 1.4045   | 13.7679  | 0.8299 | 88.1766  |
| CAR19-47_a3 | Apatite |         |          |          |          |          |          |          |         |          |          |        | 58.9836  |
| CAR19-72_a1 | Apatite | 18.3523 | 0.7660   | 0.6159   | 7.5814   | 22.9412  | 11.7066  | 12.9726  | 3.1265  | 1.0064   | 5.9513   | 0.7746 | 66.5509  |
| CAR19-72_a2 | Apatite | 29.5703 | 1.2009   | 0.3223   | 35.0301  | 5.1192   | 21.7665  | 36.2331  | 0.1510  | 4.6153   | 7.9205   | 0.7934 | 72.6115  |
| CAR19-68_a1 | Apatite | 6.5524  | 0.2327   | 0.1858   | 15.9909  | 387.7030 | 52.7088  | 107.1011 | 25.0504 | 2.9204   | 5.4076   | 0.7623 | 63.1033  |
| CAR19-68_a2 | Apatite | 7.1685  | 0.3440   | 0.2577   | 22.4447  | 291.8276 | 39.0549  | 91.0242  | 13.4338 | 2.7653   | 6.3322   | 0.7774 | 67.3988  |
| CAR19-68_a3 | Apatite | 7.0698  | 0.1375   | 0.1116   | 27.5763  | 345.8539 | 44.8668  | 108.8519 | 12.9582 | 3.1739   | 4.8811   | 0.7568 | 61.6704  |
| CAR19-61_a1 | Apatite | 14.5630 | 0.9784   | 0.7508   | 4.4300   | 28.1176  | 41.0434  | 11.0376  | 6.5579  | 0.6532   | 3.4885   | 0.7268 | 54.9090  |
| CAR19-61_a2 | Apatite | 14.7863 | 0.7559   | 0.5105   | 6.5782   | 13.6280  | 23.1122  | 9.7808   | 2.1405  | 0.6074   | 5.1637   | 0.7615 | 62.8820  |
| CAR19-61_a3 | Apatite | 26.9930 | 1.0998   | 0.6561   | 14.6078  | 5.4670   | 9.1366   | 15.8926  | 0.3867  | 1.7545   | 4.5442   | 0.7533 | 60.8114  |
| CAR19-66_a1 | Apatite | 12.9991 | 0.4361   | 0.2163   | 44.9248  | 128.3676 | 6.8123   | 75.0912  | 2.9523  | 4.1610   | 7.3172   | 0.7867 | 70.3385  |
| CAR19-66_a2 | Apatite | 54.9751 | 1.6715   | 0.7189   | 29.1782  | 22.0699  | 21.6131  | 34.3646  | 0.7815  | 8.0182   | 6.7318   | 0.7791 | 67.9059  |
| CAR19-66_a3 | Apatite | 9.0592  | 0.6903   | 0.4977   | 7.4556   | 41.6717  | 12.3364  | 17.2484  | 5.7749  | 0.6155   | 3.3438   | 0.7223 | 54.0127  |

S2: Table of raw result for AHe

| Sample       | mineral | Ft       |          | weighte  |          | Th       | 147Sm  | Th/      | He       | mass     | ESR     |        |          |
|--------------|---------|----------|----------|----------|----------|----------|--------|----------|----------|----------|---------|--------|----------|
|              |         | correcte | 2s       | d Age,   | analytic |          |        |          |          |          |         | d 2s   | analytic |
|              |         | Ma       | err., Ma | err., Ma | U (ppm)  | (ppm)    | [U]    | 238U     | (nmol/g) | (ug)     | Ft      | (mm)   |          |
| FCT102020_z1 | zircon  | 33.0779  | 7.5619   | 0.5257   | 321.8962 | 234.3351 | 0.6548 | 376.9649 | 0.7522   | 45.8849  | 3.0250  | 0.6803 | 37.7482  |
| FCT102020_z2 | zircon  | 31.3226  | 1.9049   | 0.3733   | 170.1877 | 108.8041 | 0.3445 | 195.7567 | 0.6605   | 26.7201  | 8.2809  | 0.8058 | 64.3600  |
| CAR19-45_z1  | zircon  | 23.2087  | 2.6997   | 0.5494   | 1.8720   | 23.7099  | 0.5864 | 7.4438   | 13.0863  | 0.7789   | 9.4819  | 0.8290 | 79.4660  |
| CAR19-45_z2  | zircon  | 11.0089  | 4.7565   | 2.4292   | 0.7659   | 5.3431   | 0.3388 | 2.0215   | 7.2083   | 0.0933   | 5.8554  | 0.7714 | 57.6151  |
| CAR19-45_z3  | zircon  | 298.5007 | 14.4691  | 2.3075   | 483.7465 | 74.9364  | 0.6139 | 501.3565 | 0.1601   | 704.9022 | 17.0114 | 0.8506 | 83.6214  |
| CAR19-47_z1  | zircon  | 417.4372 | 11.6336  | 2.6335   | 66.0032  | 62.7623  | 0.4220 | 80.7523  | 0.9825   | 164.9278 | 25.4927 | 0.8763 | 105.4407 |
| CAR19-47_z2  | zircon  | 229.0865 | 35.9548  | 4.7439   | 54.1031  | 73.8241  | 0.6663 | 71.4518  | 1.4098   | 71.4482  | 6.6352  | 0.7941 | 61.4000  |
| CAR19-56_z1  | zircon  | 491.6974 | 131.7172 | 15.6788  | 52.3130  | 77.3411  | 0.5332 | 70.4882  | 1.5275   | 150.1569 | 4.8454  | 0.7726 | 55.3641  |
| CAR19-56_z2  | zircon  | 14.5933  | 1.0015   | 0.7795   | 2.3507   | 70.0850  | 2.5334 | 18.8207  | 30.8048  | 1.2061   | 8.6971  | 0.8063 | 70.7670  |
| CAR19-56_z3  | zircon  | 432.2861 | 8.9814   | 4.8452   | 98.7732  | 123.3666 | 1.0325 | 127.7643 | 1.2905   | 259.7290 | 14.9714 | 0.8419 | 80.8705  |
| CAR19-56_z4  | zircon  | 328.7016 | 13.6658  | 3.3071   | 41.7588  | 25.1998  | 0.1921 | 47.6807  | 0.6235   | 71.8003  | 10.7437 | 0.8259 | 72.1294  |
| CAR19-61_z1  | zircon  | 113.2196 | 7.9114   | 0.8262   | 212.4424 | 61.1805  | 0.3456 | 226.8198 | 0.2975   | 111.2387 | 6.6005  | 0.7956 | 60.4300  |
| CAR19-61_z2  | zircon  | 89.5871  | 2.9808   | 0.9347   | 274.9460 | 132.0132 | 0.6069 | 305.9691 | 0.4961   | 121.2298 | 9.7467  | 0.8139 | 67.0477  |
| CAR19-61_z3  | zircon  | 85.3967  | 6.8046   | 0.7392   | 269.5291 | 58.3756  | 0.4471 | 283.2473 | 0.2238   | 106.0204 | 9.0958  | 0.8071 | 64.1158  |
| CAR19-61_z4  | zircon  | 91.6023  | 10.4021  | 0.4673   | 853.1514 | 260.7592 | 1.2641 | 914.4299 | 0.3158   | 364.1913 | 6.5445  | 0.8001 | 61.9002  |
| CAR19-61_z5  | zircon  | 117.6210 | 21.2997  | 1.2492   | 111.4603 | 43.7683  | 0.5569 | 121.7459 | 0.4057   | 63.2141  | 8.3012  | 0.8104 | 65.6077  |
| CAR19-62_z1  | zircon  | 128.5603 | 82.7970  | 1.3623   | 47.0322  | 35.7300  | 0.3093 | 55.4287  | 0.7849   | 31.5564  | 8.8623  | 0.8121 | 66.8114  |
| CAR19-62_z2  | zircon  | 112.4478 | 7.9154   | 1.7741   | 204.8089 | 190.1343 | 2.4967 | 249.4904 | 0.9592   | 120.6091 | 5.2782  | 0.7893 | 61.8883  |
| CAR19-62_z3  | zircon  | 128.6948 | 13.6738  | 1.3362   | 74.5673  | 111.7824 | 0.3609 | 100.8362 | 1.5489   | 58.2647  | 9.4946  | 0.8232 | 72.2393  |
| CAR19-62_z4  | zircon  |          |          |          |          |          |        |          |          |          |         |        |          |
| CAR19-62_z5  | zircon  | 114.0263 | 10.5994  | 1.5466   | 167.8298 | 55.6044  | 0.5294 | 180.8968 | 0.3423   | 87.8688  | 6.3486  | 0.7823 | 56.6021  |
| CAR19-63_z1  | zircon  | 89.0035  | 8.2054   | 0.7706   | 39.9423  | 51.3777  | 0.1557 | 52.0160  | 1.3290   | 20.8521  | 10.4026 | 0.8284 | 76.5229  |
| CAR19-63_z2  | zircon  | 123.4546 | 32.1377  | 1.0357   | 65.0884  | 39.8401  | 0.1333 | 74.4508  | 0.6324   | 40.6004  | 7.1852  | 0.8105 | 68.2861  |
| CAR19-63_z3  | zircon  | 125.4800 | 4.9690   | 2.1780   | 144.9479 | 55.8809  | 0.2032 | 158.0799 | 0.3983   | 95.2225  | 24.2811 | 0.8807 | 106.2383 |
| CAR19-63_z4  | zircon  | 175.9403 | 5.6787   | 1.5882   | 534.7861 | 60.4791  | 0.5327 | 548.9987 | 0.1168   | 411.5353 | 6.3745  | 0.7781 | 55.1181  |
| CAR19-63_z5  | zircon  | 105.0599 | 2.6387   | 1.1643   | 372.8938 | 197.6002 | 3.0968 | 419.3298 | 0.5475   | 165.7593 | 1.8374  | 0.6914 | 39.0679  |
| CAR19-66_z1  | zircon  | 101.8189 | 3.9205   | 1.2964   | 211.8903 | 34.9907  | 0.6925 | 220.1132 | 0.1706   | 98.5079  | 9.5454  | 0.8082 | 64.4005  |
| CAR19-66_z2  | zircon  | 118.9471 | 5.9535   | 1.6693   | 115.1342 | 184.1259 | 1.0811 | 158.4037 | 1.6523   | 86.4236  | 12.6139 | 0.8415 | 83.3290  |
| CAR19-66_z3  | zircon  | 300.7198 | 26.6695  | 3.7096   | 125.4931 | 140.1285 | 1.5333 | 158.4233 | 1.1537   | 190.9245 | 2.9231  | 0.7248 | 44.8215  |
| CAR19-66_z4  | zircon  | 71.5560  | 1.9735   | 0.6672   | 272.3742 | 34.4460  | 0.5183 | 280.4690 | 0.1307   | 85.3193  | 6.0038  | 0.7839 | 56.7080  |
| CAR19-66_z5  | zircon  | 94.5718  | 16.5509  | 1.2561   | 24.6033  | 23.1122  | 0.3031 | 30.0347  | 0.9706   | 12.4679  | 7.4494  | 0.8071 | 67.6022  |
| CAR19-72_z1  | zircon  | 99.6084  | 6.3806   | 0.8453   | 405.5592 | 119.9780 | 0.5541 | 433.7540 | 0.3057   | 185.5380 | 4.4553  | 0.7897 | 58.6497  |
| CAR19-72_z2  | zircon  | 134.9585 | 12.0625  | 3.9770   | 0.4980   | 3.3625   | 2.1418 | 1.2882   | 6.9760   | 0.7507   | 6.5902  | 0.7803 | 60.0615  |
| CAR19-72_z3  | zircon  | 210.2957 | 13.5552  | 2.3957   | 495.8861 | 266.6524 | 3.4043 | 558.5494 | 0.5556   | 516.7891 | 7.4460  | 0.8012 | 62.6400  |
| CAR19-68_z1  | zircon  | 265.0770 | 6.0549   | 2.4480   | 227.7122 | 135.7231 | 0.6312 | 259.6071 | 0.6158   | 307.2216 | 8.1180  | 0.8092 | 65.5176  |
| CAR19-68_z2  | zircon  | 152.2001 | 15.5668  | 1.5932   | 737.7957 | 141.2934 | 1.2249 | 770.9996 | 0.1979   | 522.2199 | 8.4707  | 0.8145 | 66.7699  |
| CAR19-68_z3  | zircon  | 231.6371 | 11.3381  | 1.8068   | 132.6312 | 26.8340  | 0.2381 | 138.9372 | 0.2090   | 146.8286 | 12.5871 | 0.8290 | 72.7415  |
| CAR19-69_z1  | zircon  | 209.2321 | 34.0198  | 2.2033   | 106.0072 | 12.6138  | 0.0877 | 108.9714 | 0.1229   | 99.2956  | 6.1915  | 0.7929 | 59.3174  |
| CAR19-69_z2  | zircon  | 97.6811  | 9.1464   | 1.4804   | 124.4586 | 67.3612  | 0.3279 | 140.2885 | 0.5592   | 58.5293  | 6.7173  | 0.7854 | 57.7745  |
| CAR19-69_z3  | zircon  | 63.3571  | 2.7175   | 0.6286   | 124.3378 | 93.4843  | 0.8481 | 146.3066 | 0.7768   | 39.9275  | 6.9708  | 0.7942 | 60.6918  |
| CAR19-69_z4  | zircon  | 107.1800 | 4.8733   | 1.4282   | 126.1544 | 87.3496  | 0.3179 | 146.6816 | 0.7154   | 68.4215  | 7.0839  | 0.7996 | 62.3308  |
| CAR19-69_z5  | zircon  | 43.3743  | 3.5820   | 1.8252   | 0.6895   | 8.5991   | 2.9336 | 2.7102   | 12.8864  | 0.5136   | 9.5696  | 0.7960 | 66.0010  |

65 S3: Table of raw result for ZHe
